# Supplementary material for: Potential of Tyrosine Kinase Receptor TIE-1 as Novel Therapeutic Target in High-PI3K-Expressing Ovarian Cancer
Source: MDPI journal article supplement (doi:10.3390/cancers12061705), 2020-06-26
Supplement: s1 [file s1]

## **Supplemental Figure 5**

# **Whole blots of western blot analysis**

Figure 1A

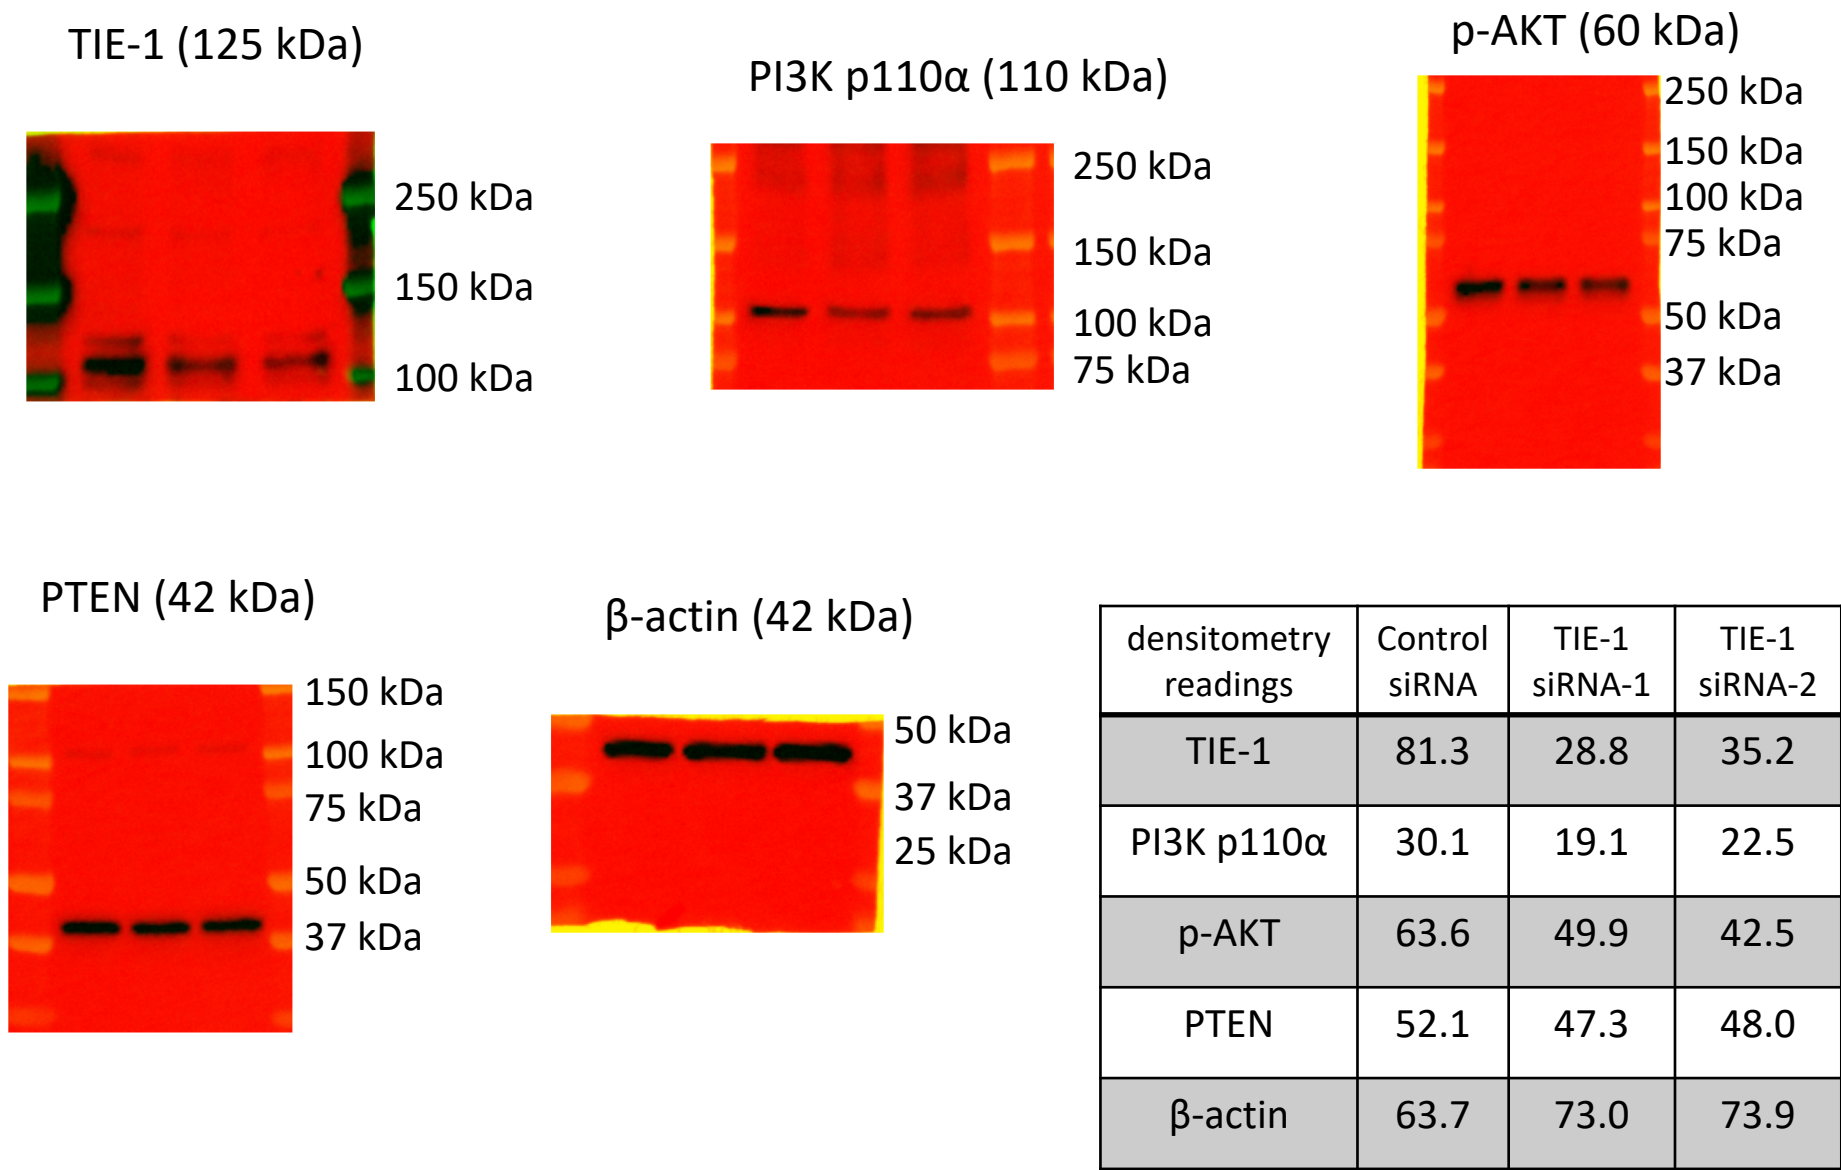

Figure 1D

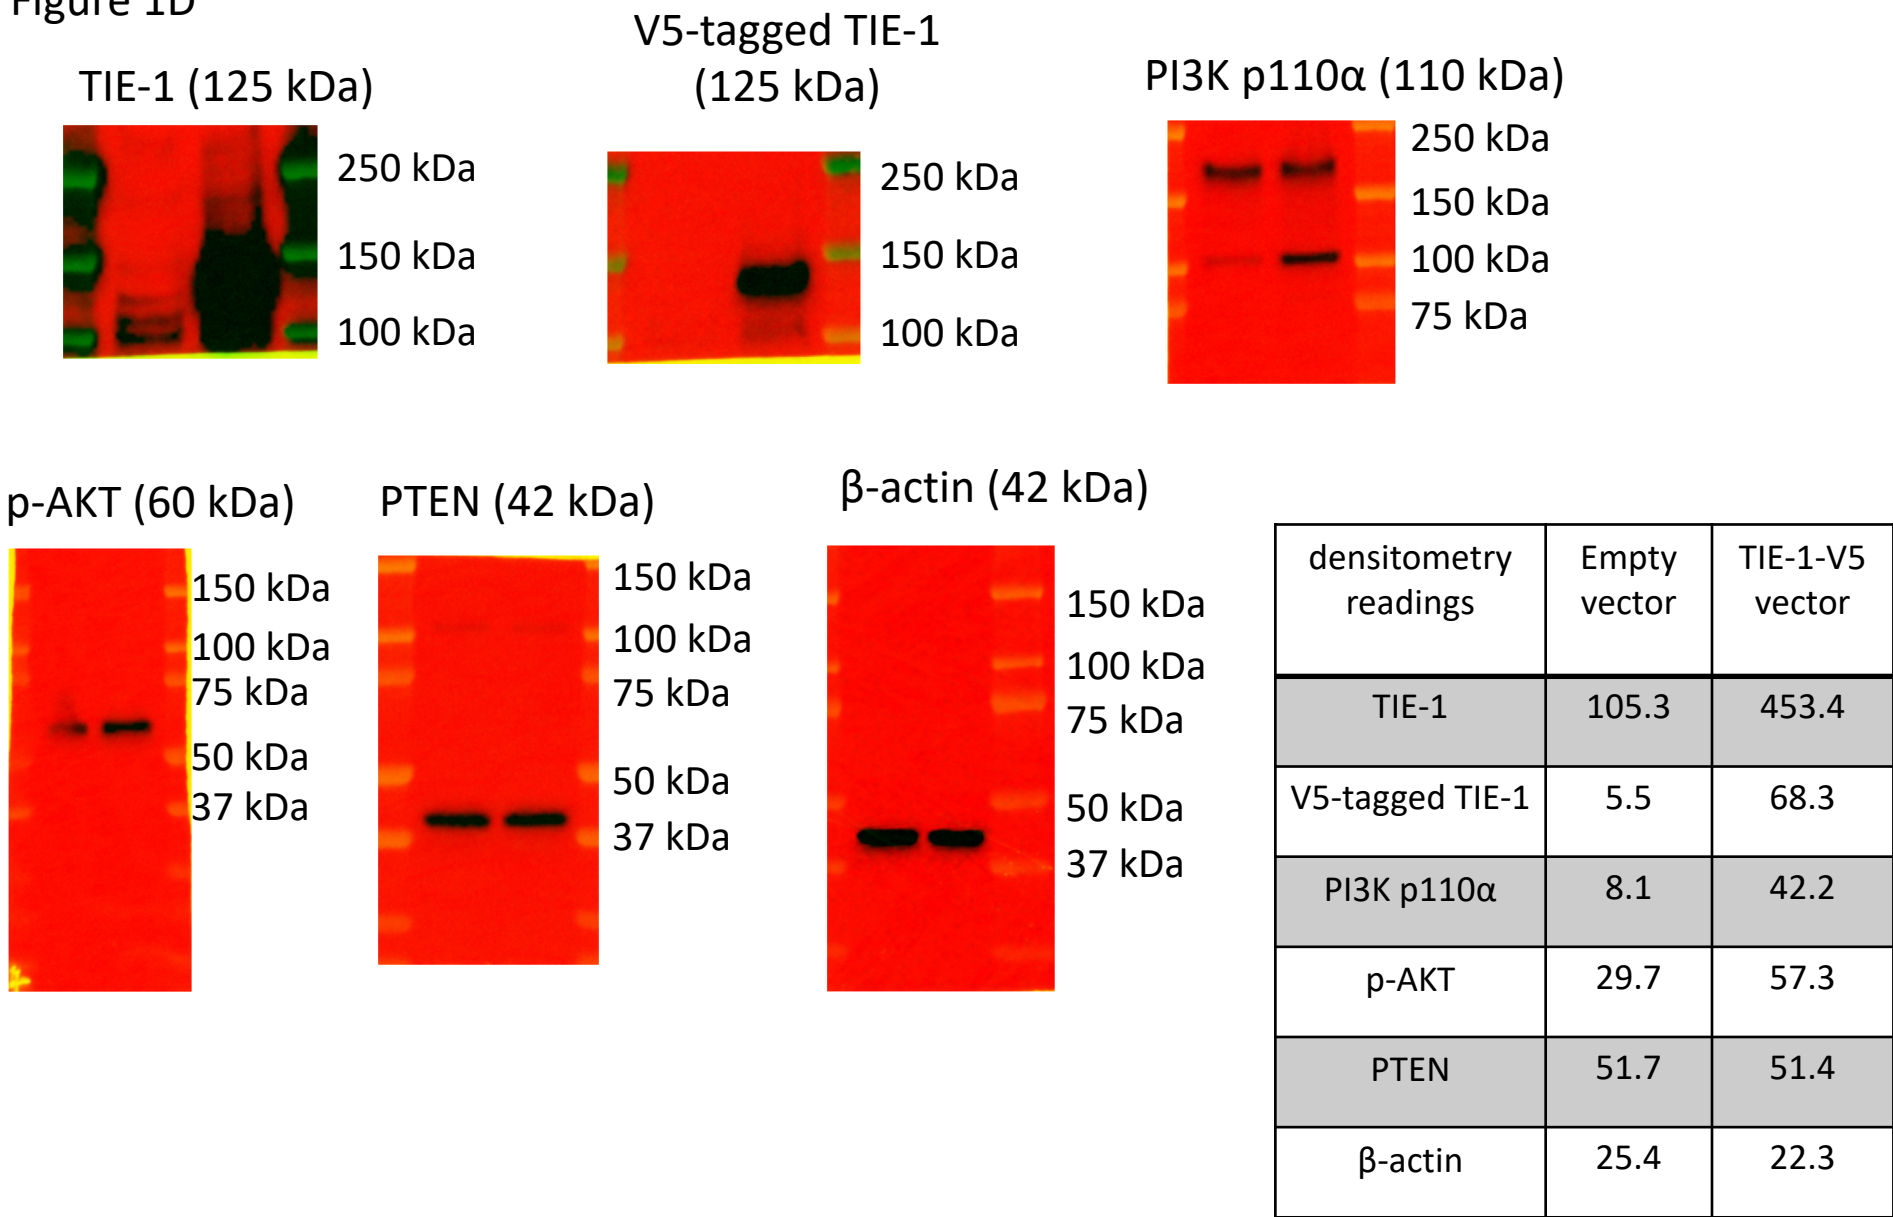

Figure 2A

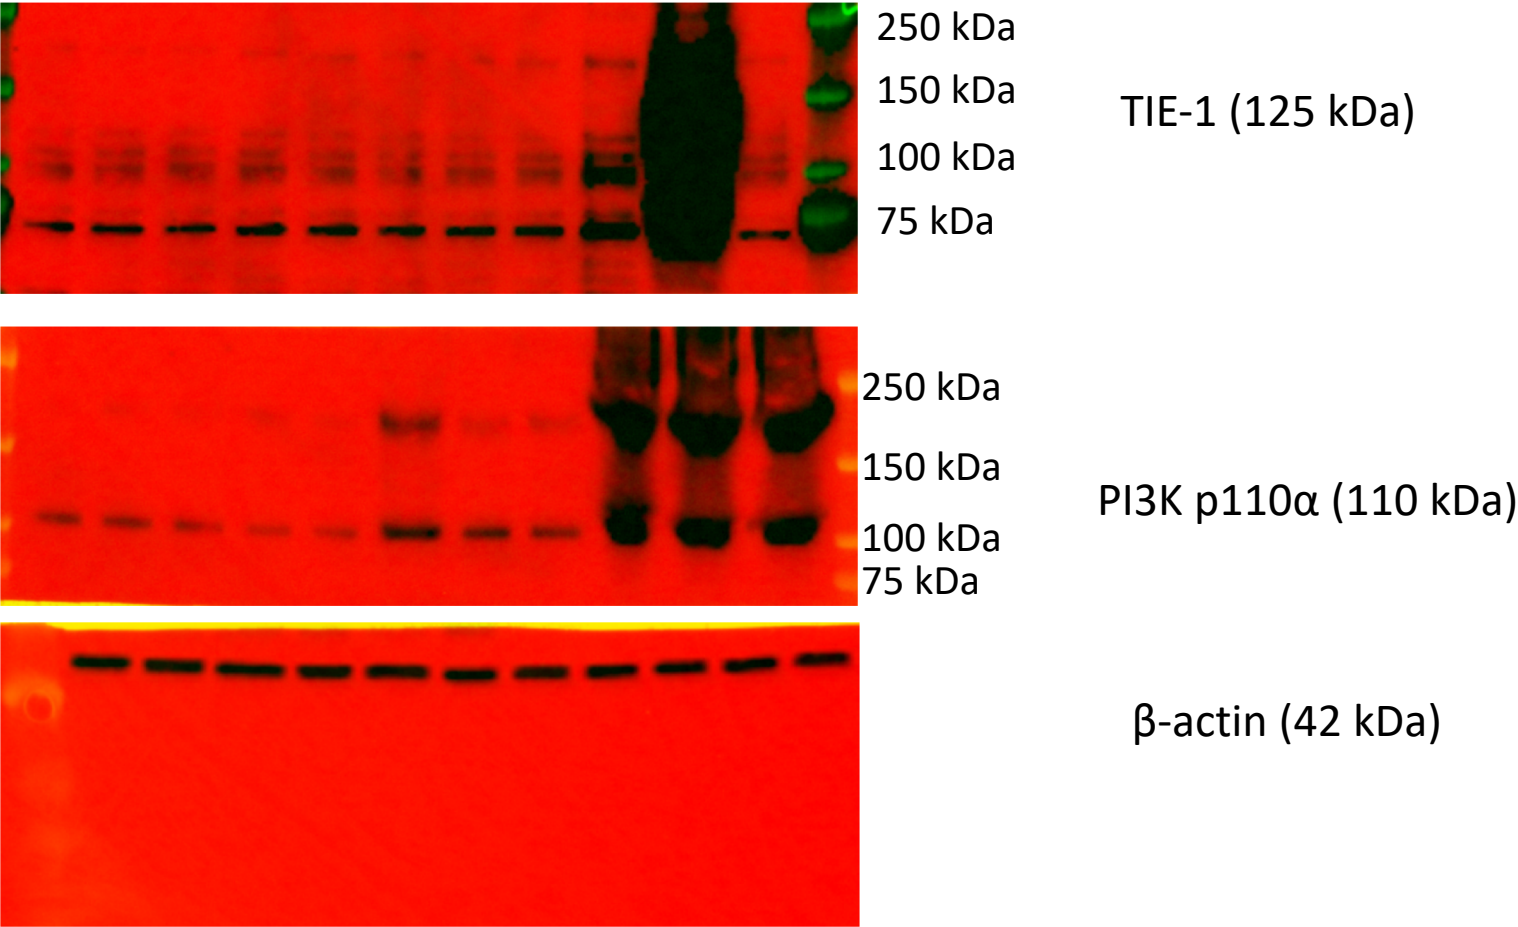

| densitometry readings | TOV112D | A2780 | A2780cp | PE01 | PE04 | CAOV3 | JHOC5 | JHOC7 | JHOC8 | ES2   | SKOV3 |
|-----------------------|---------|-------|---------|------|------|-------|-------|-------|-------|-------|-------|
| TIE-1                 | 34.5    | 46.2  | 46.6    | 55.4 | 54.9 | 54.9  | 52.9  | 54.2  | 148.3 | 528.1 | 56.1  |
| PI3K p110α            | 19.0    | 13.9  | 14.2    | 8.7  | 10.9 | 50.3  | 29.2  | 23.1  | 115.4 | 106.0 | 103.9 |
| β-actin               | 15.3    | 14.7  | 17.0    | 13.6 | 15.5 | 13.8  | 12.5  | 12.4  | 12.6  | 13.9  | 12.5  |



Figure 2E

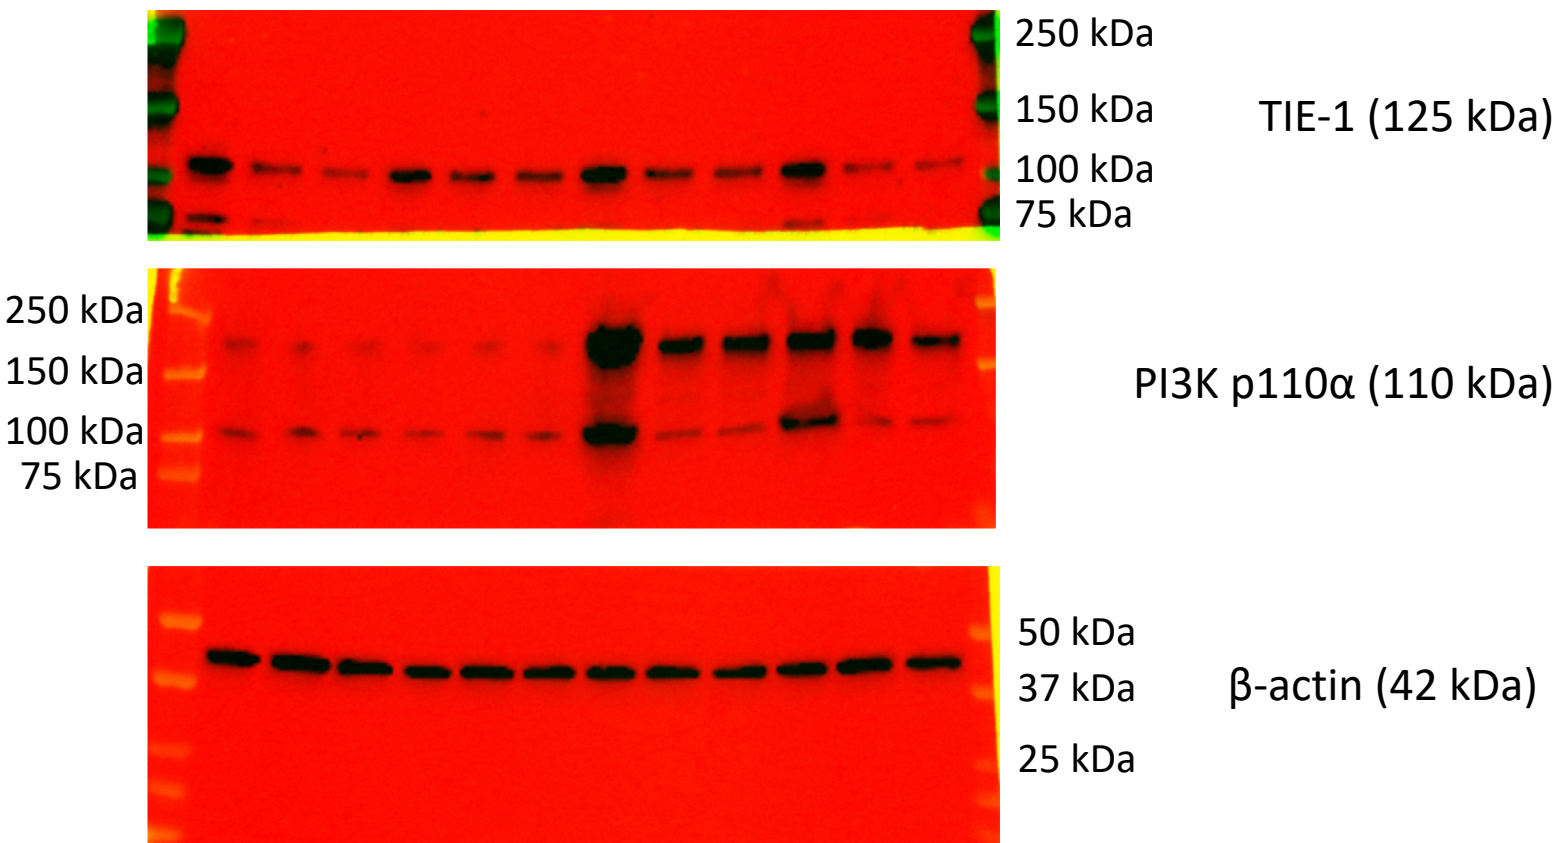

| densitometry readings | Tov con | Tov TIE-1 si-1 | Tov TIE-1 si-2 | A2780 con | A2780 TIE-1 si-1 | A2780 TIE-1 si-2 | SK con | SK TIE-1 si-1 | SK TIE-1 si-2 | CAOV3 con | CAOV3 TIE-1 si-1 | CAOV3 TIE-1 si-2 |
|-----------------------|---------|----------------|----------------|-----------|------------------|------------------|--------|---------------|---------------|-----------|------------------|------------------|
| TIE-1                 | 65.4    | 21.7           | 13.3           | 43.4      | 28.7             | 27.7             | 64.3   | 30.3          | 25.4          | 58.8      | 15.0             | 11.8             |
| PI3K p110α            | 13.8    | 14.3           | 11.9           | 7.6       | 12.8             | 13.0             | 107.3  | 14.9          | 13.3          | 73.8      | 10.6             | 9.5              |
| β-actin               | 70.4    | 84.9           | 70.9           | 53.8      | 64.5             | 60.4             | 60.1   | 61.4          | 58.1          | 64.3      | 75.4             | 62.0             |

Figure 3I

PARP (116 kDa)  
Cleaved PARP (89 kDa)

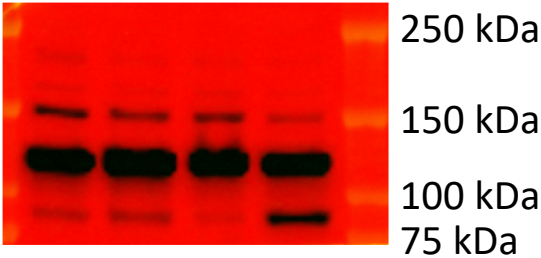

Procaspase-3 (35 kDa)

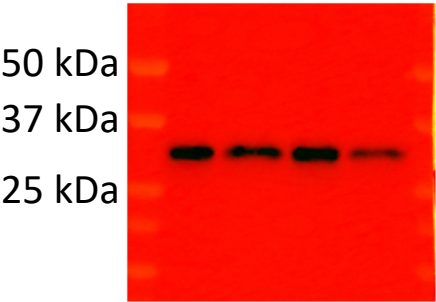

Cleaved caspase-3  
(17,19 kDa)

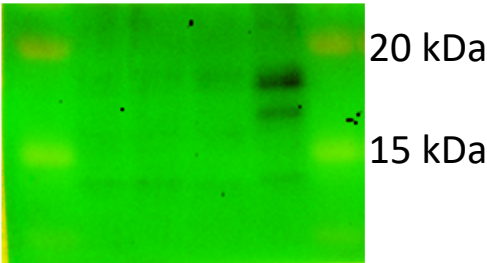

$\beta$ -actin (42 kDa)

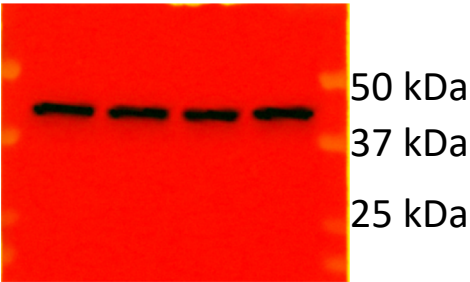

| densitometry readings | Tov112D control siRNA | Tov112D TIE-1 siRNA | SKOV3 control siRNA | SKOV3 TIE-1 siRNA |
|-----------------------|-----------------------|---------------------|---------------------|-------------------|
| PARP                  | 117.6                 | 135.4               | 114.3               | 111.7             |
| Cleaved PARP          | 16.8                  | 20.3                | 8.7                 | 49.5              |
| Procaspase-3          | 69.2                  | 64.5                | 75.9                | 36.2              |
| Cleaved caspase-3     | 64.5                  | 72.5                | 81.5                | 152.5             |
| $\beta$ -actin        | 51.8                  | 48.7                | 44.3                | 51.0              |

Figure 4A

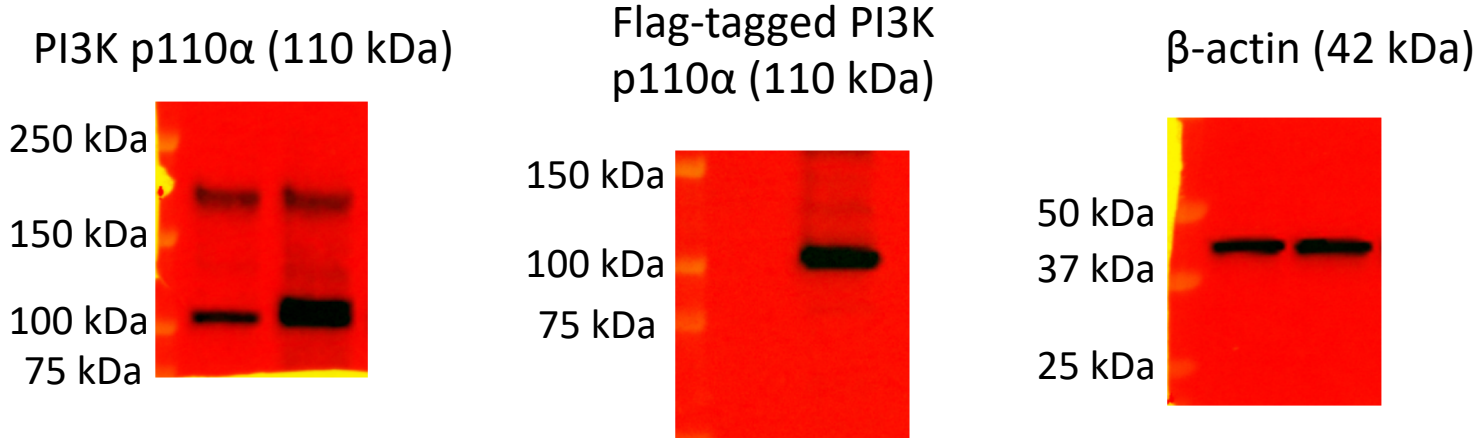

| densitometry readings | Empty vector | PI3K-Flag-vector |
|-----------------------|--------------|------------------|
| TIE-1                 | 1.7          | 81.4             |
| PI3K p110α            | 34.0         | 100.9            |
| β-actin               | 59.7         | 68.7             |

Figure 4E

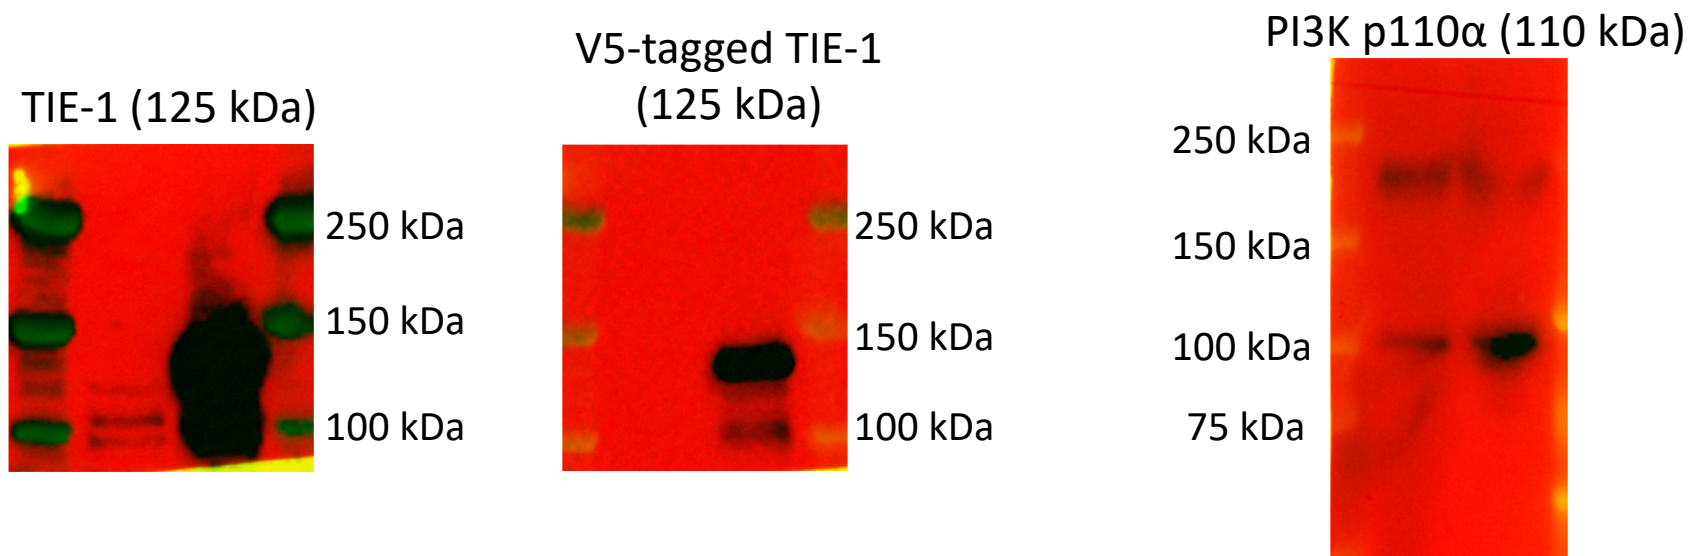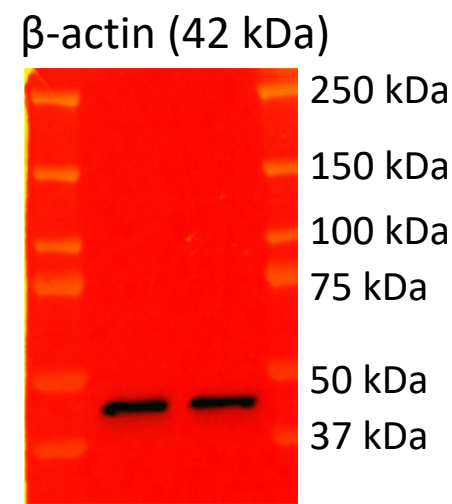

| densitometry readings | Empty vector polyclone cells | TIE-1 stably overexpressing polyclone |
|-----------------------|------------------------------|---------------------------------------|
| TIE-1                 | 58.1                         | 357.4                                 |
| V5-tagged TIE-1       | 5.5                          | 64.1                                  |
| PI3K p110α            | 43.1                         | 81.2                                  |
| β-actin               | 59.3                         | 53.2                                  |

Figure 4I

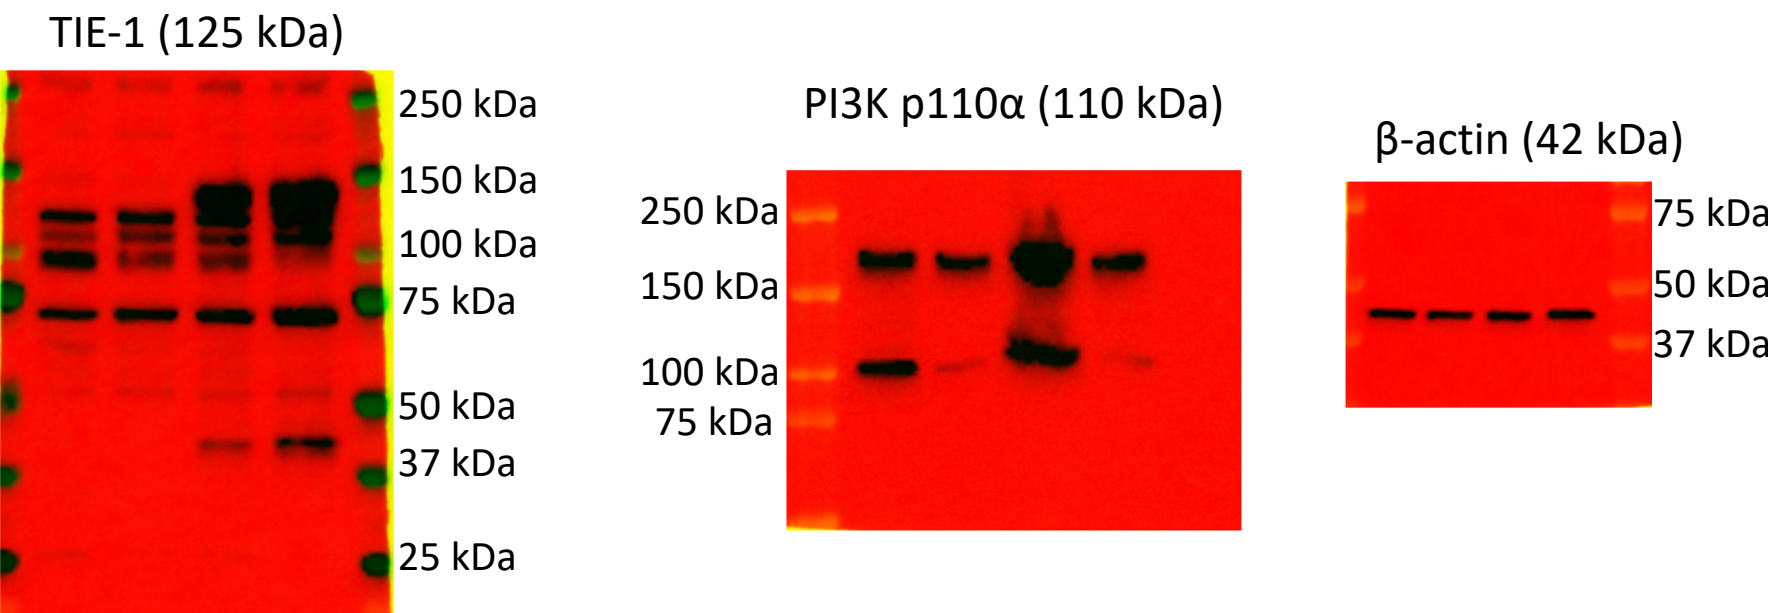

| densitometry readings | Empty-control siRNA | Empty-PI3K siRNA | TIE-1-control siRNA | TIE-1-PI3K siRNA |
|-----------------------|---------------------|------------------|---------------------|------------------|
| TIE-1                 | 70.1                | 84.0             | 180.9               | 231.9            |
| PI3K p110 $\alpha$    | 51.7                | 6.6              | 96.9                | 6.2              |
| $\beta$ -actin        | 27.1                | 26.7             | 27.8                | 33.0             |

Supplemental Figure 1

p-PI3K p85 (85 kDa)  
p-PI3K p55 (60 kDa)

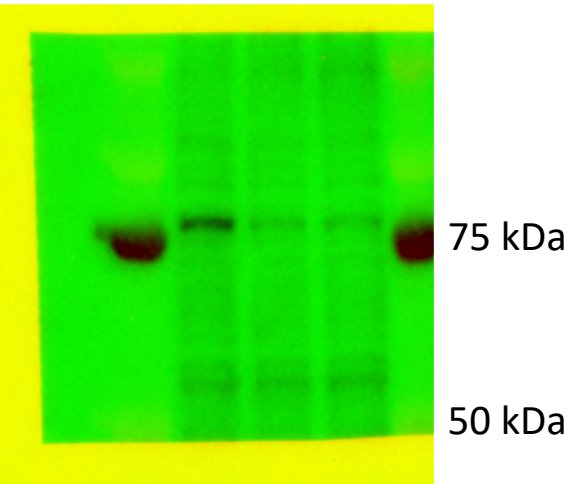

AKT (60 kDa)

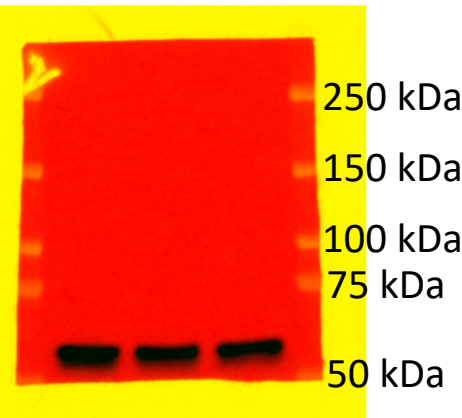

| densitometry readings | Control siRNA | TIE-1 siRNA-1 | TIE-1 siRNA-2 |
|-----------------------|---------------|---------------|---------------|
| p-PI3K p85            | 32.8          | 16.9          | 18.6          |
| p-PI3K p55            | 23.2          | 21.4          | 22.8          |
| AKT                   | 77.9          | 67.6          | 68.3          |

p-PI3K p85 (85 kDa)  
p-PI3K p55 (60 kDa)

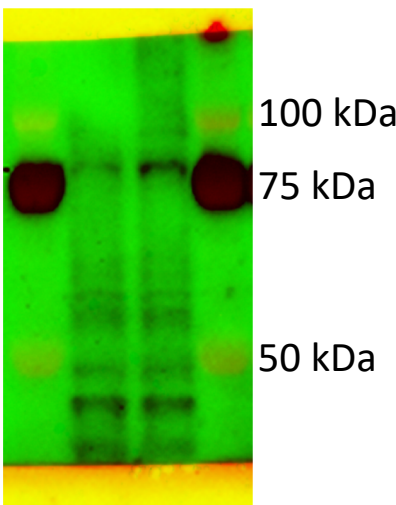

AKT (60 kDa)

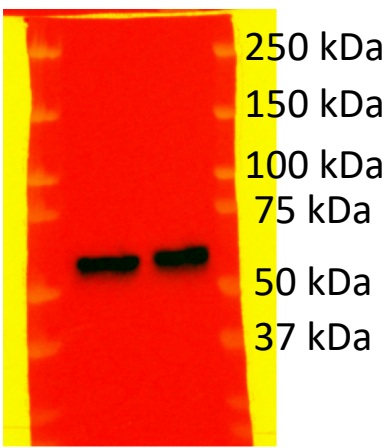

| densitometry readings | Empty vector | TIE-1-V5 vector |
|-----------------------|--------------|-----------------|
| p-PI3K p85            | 33.7         | 47.3            |
| p-PI3K p55            | 36.7         | 36.6            |
| AKT                   | 73.9         | 71.7            |

Supplemental Figure 4

Procaspase-3 (35 kDa)

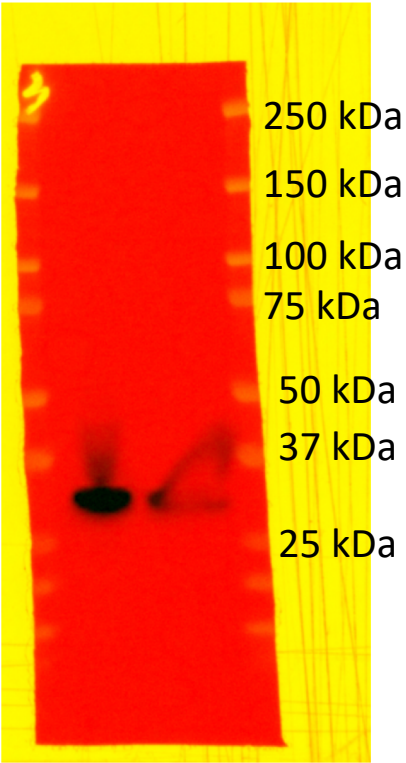

PARP (116 kDa)  
Cleaved PARP (89 kDa)

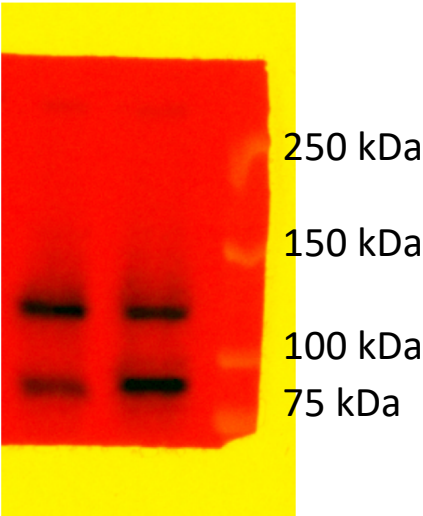

$\beta$ -actin (42 kDa)

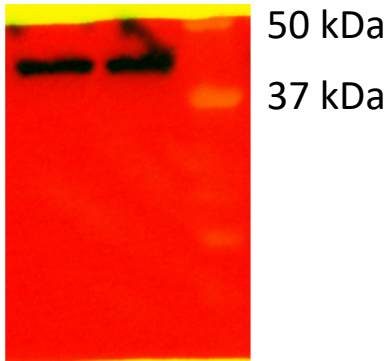

| densitometry readings | CAOV3 control siRNA | CAOV3 TIE-1 siRNA |
|-----------------------|---------------------|-------------------|
| PARP                  | 47.3                | 41.5              |
| Cleaved PARP          | 28.2                | 51.0              |
| Procaspase-3          | 82.5                | 31.2              |
| $\beta$ -actin        | 61.8                | 65.2              |



TIE-1  
(125 kDa)

250 kDa  
150 kDa  
100 kDa  
75 kDa

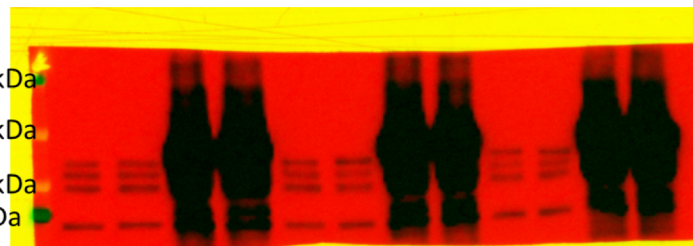

PI3K p110 $\alpha$   
(110 kDa)

250 kDa  
150 kDa  
100 kDa  
75 kDa  
50 kDa

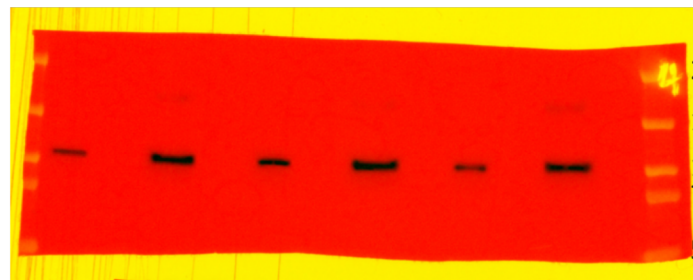

$\beta$ -actin  
(42 kDa)

50 kDa  
37 kDa  
25 kDa

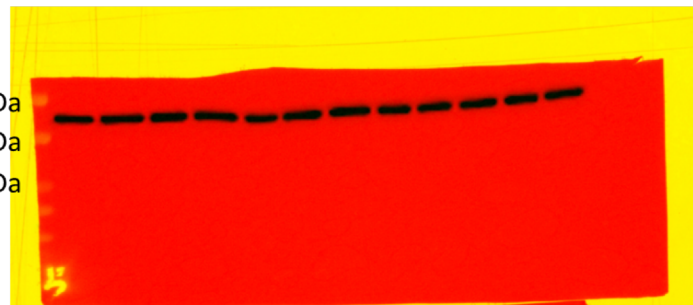

| densitometry readings | Day 3<br>Empty<br>Control si | Day 3<br>Empty<br>PI3K si | Day 3<br>TIE-1 OE<br>Control si | Day 3<br>TIE-1 OE<br>PI3K si | Day 5<br>Empty<br>Control si | Day 5<br>Empty<br>PI3K si | Day 5<br>TIE-1 OE<br>Control si | Day 5<br>TIE-1 OE<br>PI3K si | Day 7<br>Empty<br>Control si | Day 7<br>Empty<br>PI3K si | Day 7<br>TIE-1 OE<br>Control si | Day 7<br>TIE-1 OE<br>PI3K si |
|-----------------------|------------------------------|---------------------------|---------------------------------|------------------------------|------------------------------|---------------------------|---------------------------------|------------------------------|------------------------------|---------------------------|---------------------------------|------------------------------|
| TIE-1                 | 27.4                         | 37.7                      | 268.4                           | 272.9                        | 35.5                         | 37.5                      | 266.1                           | 220.7                        | 28.3                         | 34.6                      | 227.9                           | 270.9                        |
| PI3K p110 $\alpha$    | 15.3                         | 1.1                       | 53.1                            | 1.2                          | 29.6                         | 1.0                       | 58.3                            | 1.3                          | 19.5                         | 1.0                       | 50.6                            | 1.2                          |
| $\beta$ -actin        | 42.8                         | 49.1                      | 48.5                            | 51.4                         | 37.7                         | 48.3                      | 54.6                            | 42.8                         | 42.1                         | 46.9                      | 44.0                            | 45.7                         |



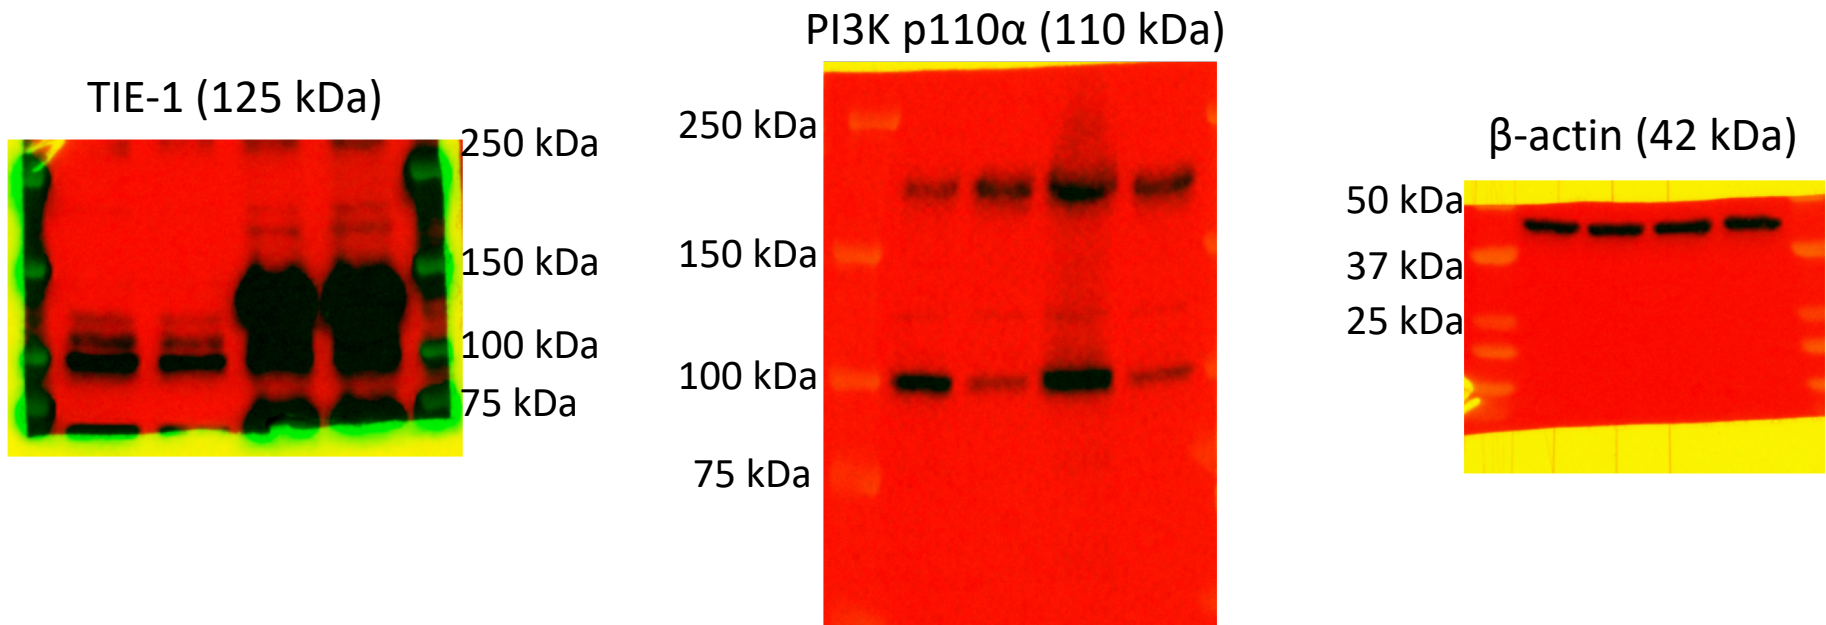

| densitometry readings | Empty-control siRNA | Empty-PI3K siRNA | TIE-1-control siRNA | TIE-1-PI3K siRNA |
|-----------------------|---------------------|------------------|---------------------|------------------|
| TIE-1                 | 67.8                | 49.9             | 258.3               | 285.8            |
| PI3K p110α            | 11.8                | 3.4              | 21.7                | 3.8              |
| β-actin               | 34.8                | 35.4             | 38.3                | 37.5             |
