# Supplementary material for: Potential of Tyrosine Kinase Receptor TIE-1 as Novel Therapeutic Target in High-PI3K-Expressing Ovarian Cancer
Source: MDPI journal article supplement (doi:10.3390/cancers12061705), 2020-06-26
Supplement: s1 [file s1]

## Supplemental Figure 1

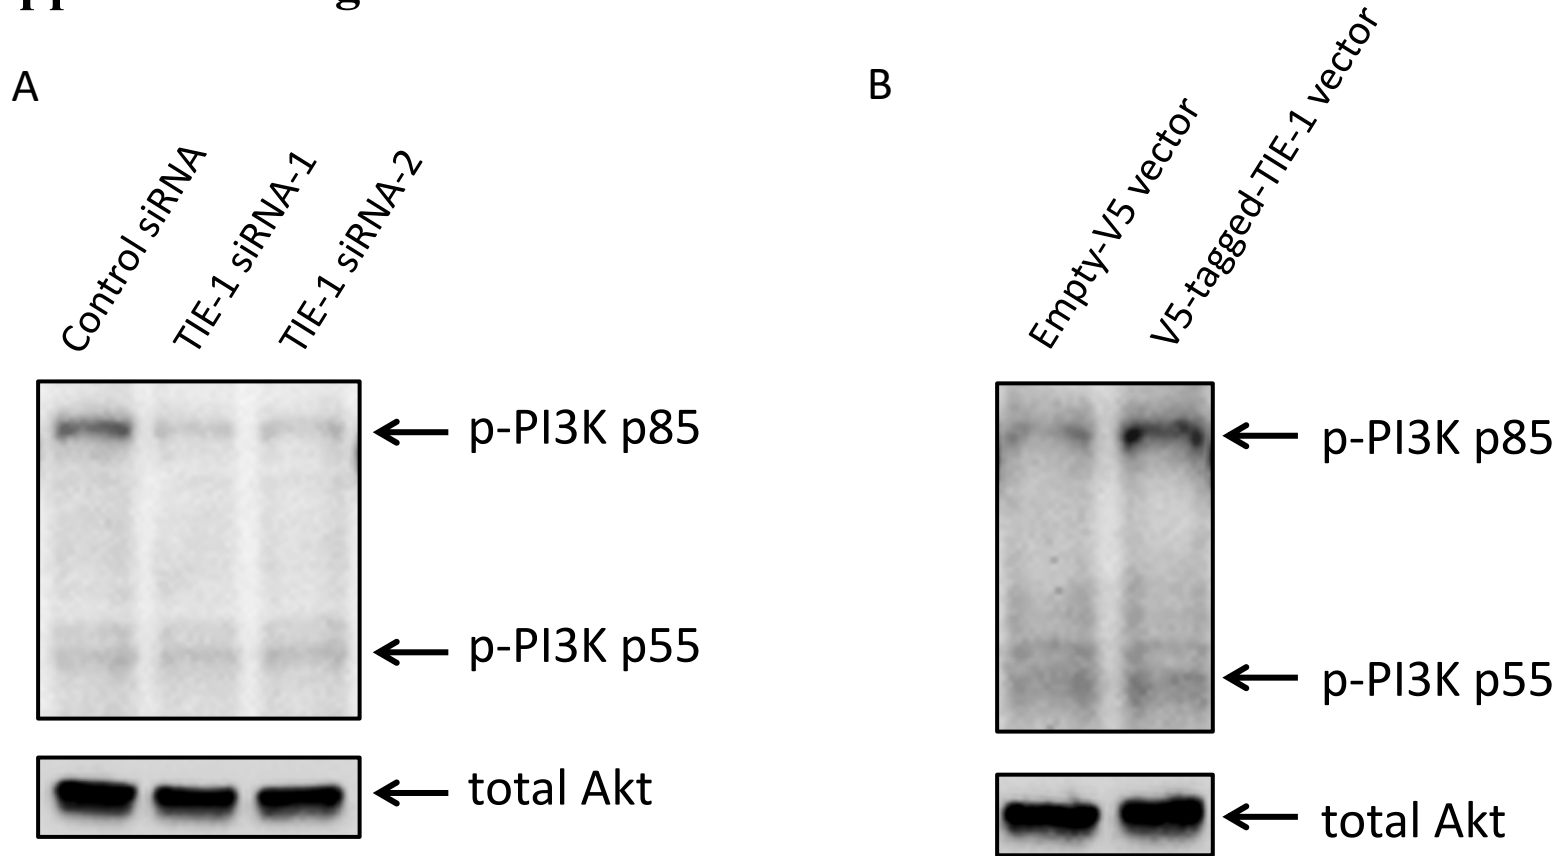

**Supplemental Figure 1** *TIE-1 knockdown/overexpression effect on the expression of key proteins in PI3K/Akt pathway.*

**A**, SKOV3 ovarian cancer cells were transfected with 5 nM TIE-1 siRNA-1, TIE-1 siRNA-2, or control siRNA for 72 h. Extracted cellular proteins were subjected to immunoblot analysis with antibodies against p-PI3K and Akt. Equal amounts of proteins were loaded in each lane. Three independent experiments were performed, and representative images are shown.

**B**, SKOV3 ovarian cancer cells were transfected with an empty vector or V5-tagged-TIE-1 vector for 72 h. Extracted cellular proteins were subjected to immunoblot analysis with antibodies against p-PI3K and Akt. Equal amounts of proteins were loaded in each lane. Three independent experiments were performed, and representative images are shown.

# Supplemental Figure 2

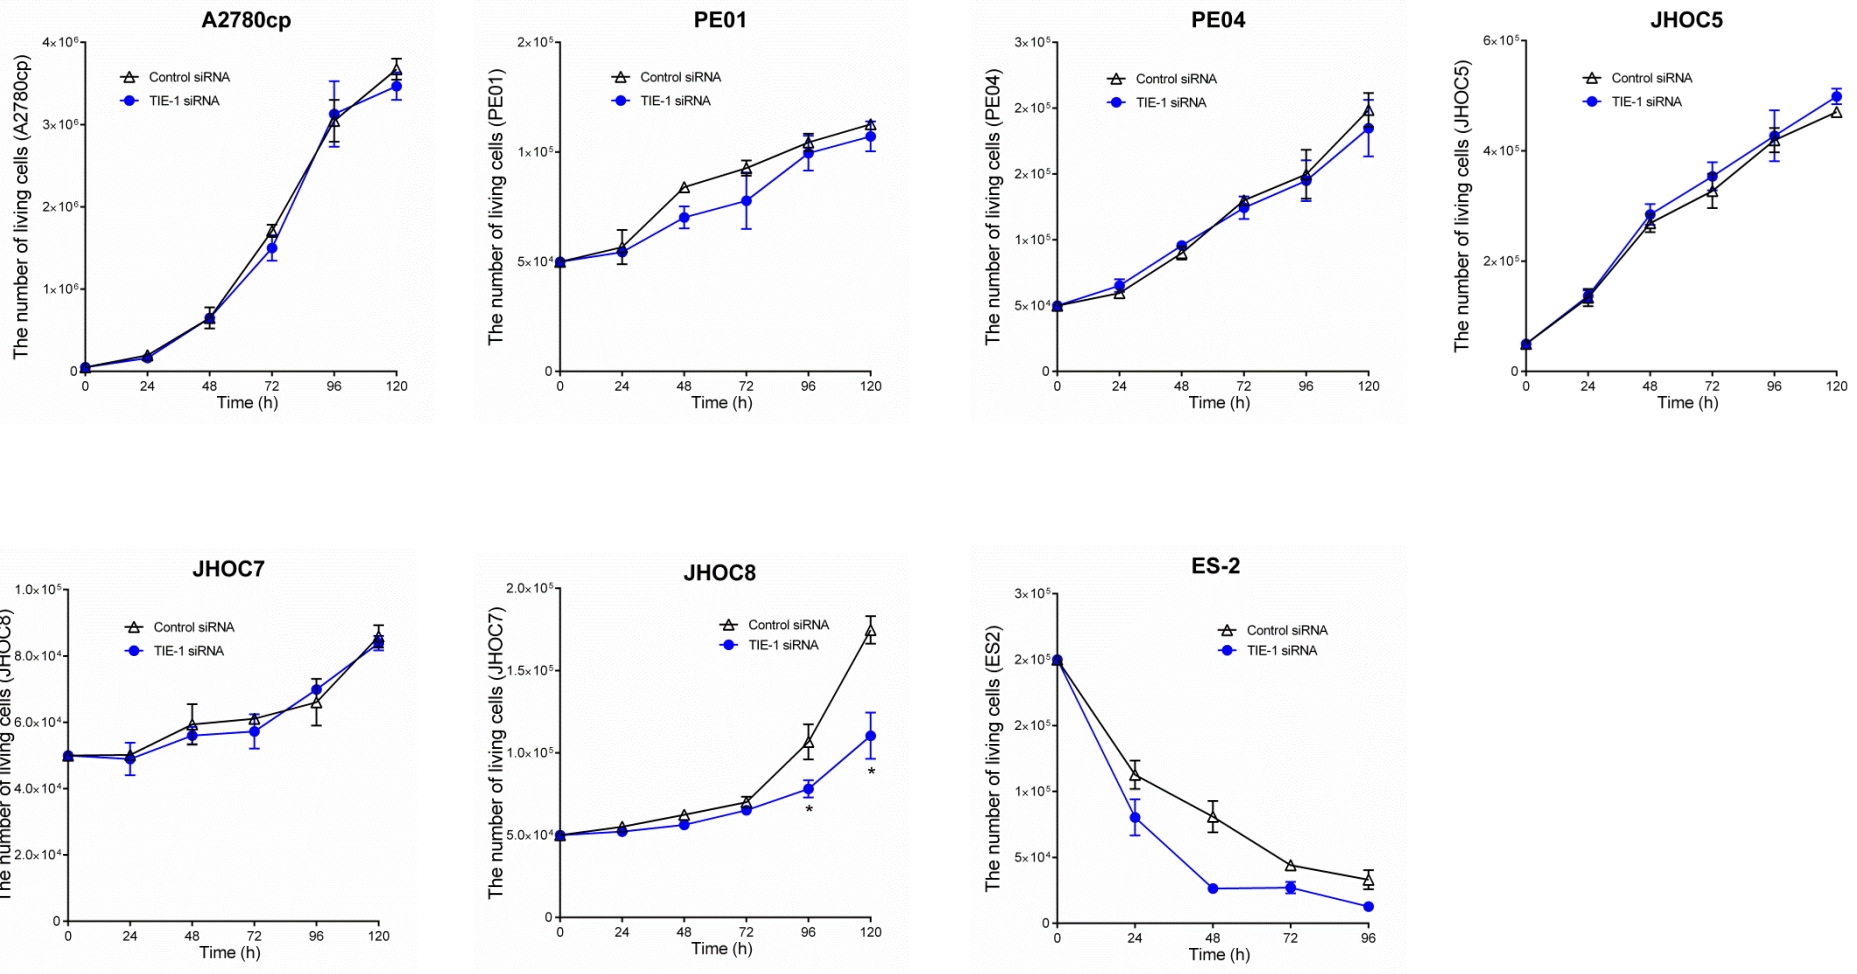

**Supplemental Figure 2 The Effects of TIE-1 Knock-down on cell proliferation in multiple ovarian cancer cell lines.** Seven ovarian cancer cell lines were transfected with 5 nM TIE-1 siRNA or control siRNA up to 120 h. The number of living cells was counted. Values are shown as the mean  $\pm$  SD (n = 3).

## Supplemental Figure 3

TOV112D

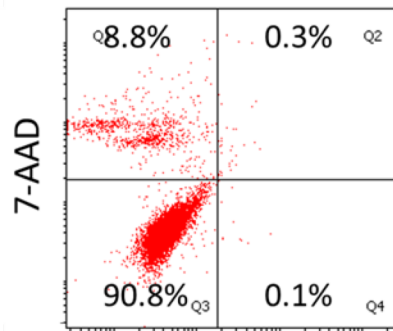

Annexin V  
Control (DMSO)

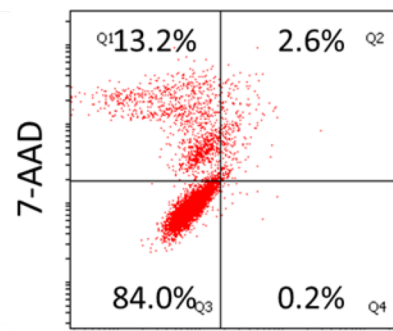

Annexin V  
GDC-0941

A2780

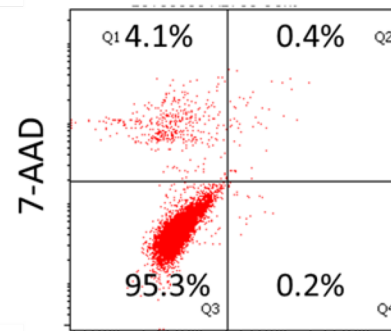

Annexin V  
Control (DMSO)

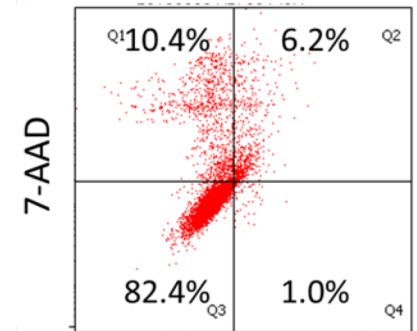

Annexin V  
GDC-0941

SKOV3

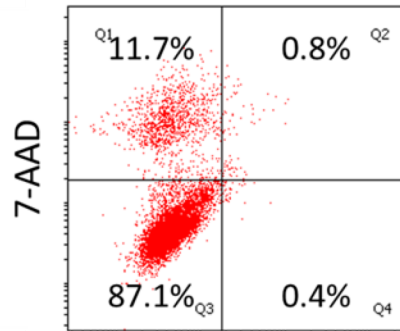

Annexin V  
Control (DMSO)

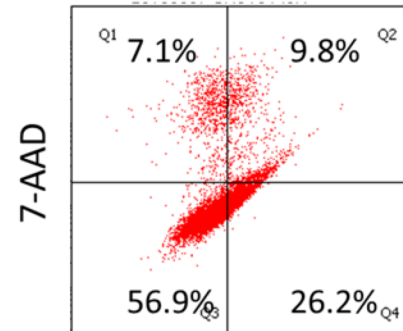

Annexin V  
GDC-0941

CAOV3

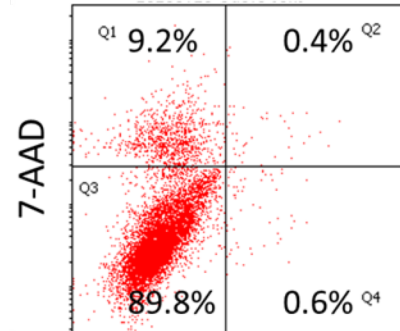

Annexin V  
Control (DMSO)

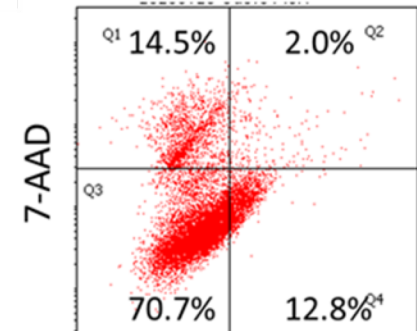

Annexin V  
GDC-0941

**Supplemental Figure 3 PI3K inhibitor GDC-0941 induces apoptosis in multiple ovarian cancer cell lines.**

Four ovarian cancer cell lines were treated with 10  $\mu$ M GDC-0941 or control DMSO for 72 h and assessed as described in “Materials and Methods”. Annexin V/7-AAD assays were performed for determining apoptotic cell death.

## Supplemental Figure 4

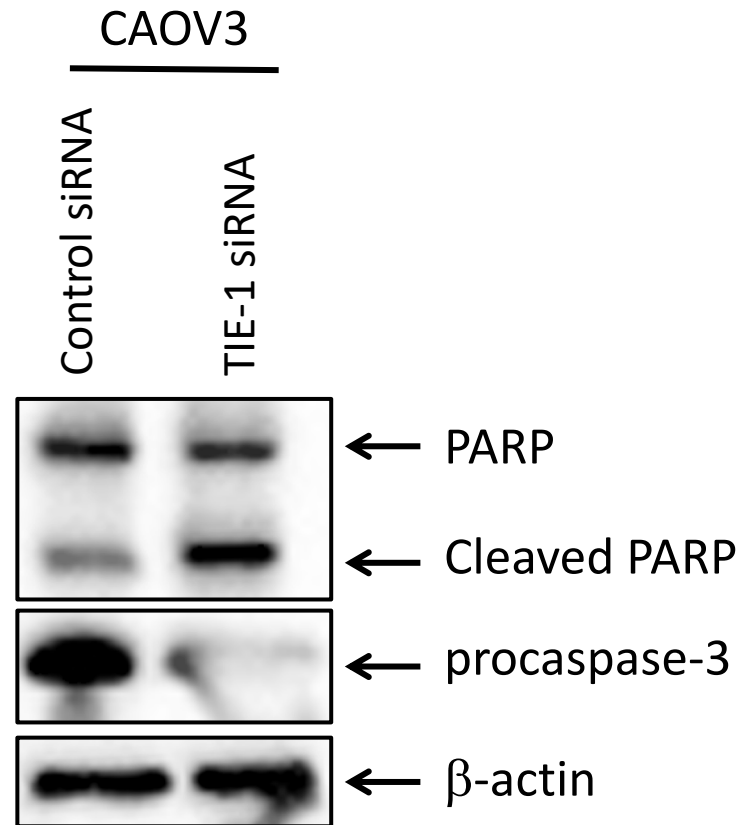

***Supplemental Figure 4 Inhibition of TIE-1 induces apoptosis in PI3K high expressing CAOV3 cell lines.***

CAOV3 cells were transfected with 5 nM TIE-1 siRNA or control siRNA for 72 h, and extracted cellular proteins were subjected to immunoblot analysis with antibodies for PARP, procaspase-3 and  $\beta$ -actin. Equal amounts of proteins were loaded in each lane. Three independent experiments were performed, and representative images are shown.
